# Supplementary material for: Glycerol hydro-deoxygenation aided by in situ H2 generation via methanol aqueous phase reforming over a Cu–ZnO–Al2O3 catalyst
Source: Royal Society of Chemistry journal article supplement (doi:10.1039/c6cy00132g), 2016-01-01
Supplement: c6cy00132g1.pdf [file c6cy00132g1.pdf]

## Supporting information

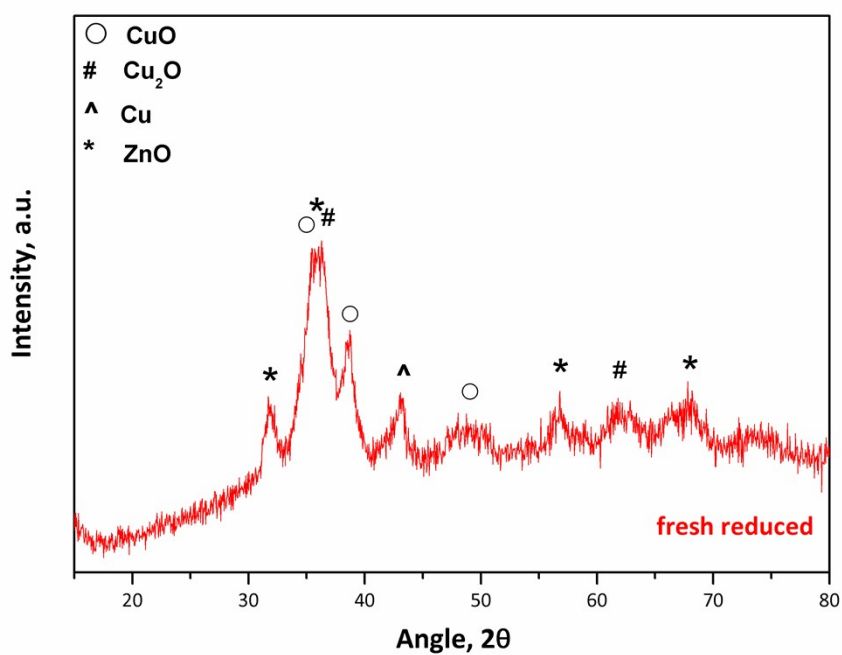

Fig. S1 : XRD pattern of the fresh reduced Cu:Zn:Al catalyst

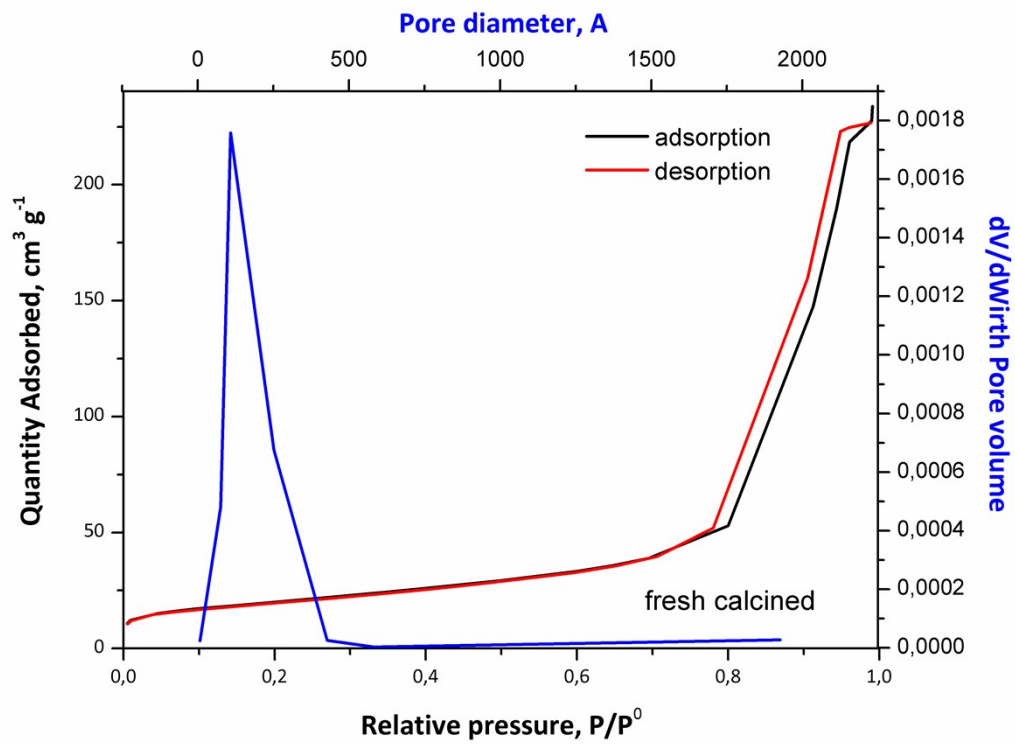

**Fig.S2:** Adsorption – Desorption isotherms and pore size distribution of the fresh calcined Cu:Zn:Al catalyst
